# Supplementary material for: The effect of age and sexual maturation on thermal preferences of honey bee drones
Source: PeerJ. 2022 Jun 29;10:e13494. doi: 10.7717/peerj.13494 (PMC9258603; doi:10.7717/peerj.13494)
Supplement: Supplemental Information 1 [file peerj-10-13494-s001.xlsx]

## Sheet: Raw data
	Day of life	Temp. drones	Day of life	Temp. drones	Day of life	Temp. drones	Day of life	Temp. drones	Day of life	Temp. drones	Day of life	Temp. drones
	1	20.1	5	21.9	10	23.6	15	23.5	20	24.6	25	24.8
	1	20.1	5	22.4	10	24.5	15	25.2	20	26	25	25
	1	20.2	5	23	10	25.5	15	25.2	20	26.1	25	25.1
	1	20.3	5	23	10	26.3	15	25.2	20	26.4	25	25.3
	1	20.3	5	23.1	10	26.4	15	25.2	20	27.2	25	25.3
	1	20.7	5	23.7	10	26.5	15	25.5	20	27.2	25	25.3
	1	20.7	5	24	10	26.5	15	25.5	20	27.5	25	25.4
	1	20.8	5	24.3	10	26.5	15	25.9	20	27.5	25	25.5
	1	20.8	5	24.3	10	26.5	15	26.4	20	27.5	25	25.6
	1	20.9	5	24.4	10	26.5	15	26.9	20	27.8	25	25.7
	1	20.9	5	24.8	10	26.5	15	26.9	20	27.8	25	26.2
	1	20.9	5	25	10	26.6	15	27.3	20	28	25	26.2
	1	21	5	25.3	10	26.6	15	27.4	20	28.1	25	26.3
	1	21.1	5	25.4	10	26.8	15	27.9	20	28.1	25	26.3
	1	21.1	5	25.4	10	26.8	15	27.9	20	28.1	25	26.4
	1	21.1	5	25.6	10	27.1	15	28.3	20	28.2	25	26.5
	1	21.1	5	25.7	10	27.1	15	28.3	20	28.3	25	26.6
	1	21.1	5	26.1	10	27.1	15	28.5	20	28.3	25	26.6
	1	21.2	5	26.6	10	27.3	15	29.1	20	28.5	25	26.6
	1	21.3	5	26.6	10	27.3	15	29.1	20	28.5	25	26.7
	1	21.3	5	26.7	10	27.5	15	29.1	20	29.3	25	26.8
	1	21.4	5	26.9	10	27.6	15	30	20	29.3	25	27
	1	21.4	5	27.1	10	28.4	15	30	20	29.3	25	27
	1	21.5	5	27.6	10	28.5	15	30.1	20	29.4	25	27.1
	1	21.6	5	27.7	10	28.6	15	30.4	20	29.4	25	27.2
	1	21.6	5	27.7	10	28.6	15	30.5	20	29.5	25	27.3
	1	21.6	5	27.9	10	28.7	15	30.7	20	29.5	25	27.5
	1	21.6	5	29	10	28.9	15	30.7	20	29.5	25	27.6
	1	21.8	5	29.4	10	28.9	15	30.7	20	29.5	25	27.6
	1	22.1	5	29.6	10	29.1	15	31.2	20	29.8	25	27.7
	1	22.1	5	30.1	10	29.2	15	31.4	20	29.9	25	27.8
	1	22.2	5	30.2	10	29.4	15	31.5	20	30	25	27.8
	1	22.3	5	30.5	10	29.4	15	31.8	20	30	25	27.9
	1	22.4	5	31.3	10	30	15	32	20	30	25	28
	1	22.4	5	31.6	10	30	15	32	20	30	25	28
	1	22.6	5	31.7	10	30.1	15	32.2	20	30.1	25	28
	1	22.6	5	31.8	10	30.1	15	32.3	20	30.1	25	28.2
	1	22.6	5	31.8	10	30.1	15	32.3	20	30.2	25	28.2
	1	22.7	5	31.8	10	30.1	15	32.3	20	30.3	25	28.2
	1	22.7	5	31.8	10	30.4	15	32.3	20	30.4	25	28.2
	1	22.8	5	31.9	10	30.4	15	33.1	20	30.4	25	28.5
	1	23	5	32.2	10	30.4	15	33.2	20	30.5	25	28.6
	1	23.1	5	32.2	10	30.6	15	33.6	20	30.5	25	28.6
	1	23.1	5	32.3	10	30.8	15	33.7	20	30.7	25	28.7
	1	23.1	5	32.5	10	30.9	15	33.7	20	30.7	25	28.7
	1	23.2	5	32.5	10	31.2	15	33.7	20	30.7	25	28.9
	1	23.3	5	32.7	10	31.2	15	33.7	20	30.8	25	29
	1	23.3	5	32.9	10	31.2	15	33.7	20	30.9	25	29.1
	1	23.4	5	33.2	10	31.2	15	33.9	20	30.9	25	29.4
	1	23.5	5	33.4	10	31.4	15	34.2	20	31	25	29.6
	1	23.5	5	33.4	10	31.6	15	35.2	20	31	25	29.8
	1	23.5	5	33.6	10	31.7	15	35.3	20	31.1	25	29.8
	1	23.6	5	33.8	10	31.7	15	35.4	20	31.1	25	29.9
	1	23.7	5	33.8	10	31.7	15	35.7	20	31.2	25	29.9
	1	23.7	5	33.8	10	31.9	15	35.9	20	31.2	25	30
	1	23.9	5	34	10	32	15	36	20	31.2	25	30.2
	1	23.9	5	34.2	10	32.1	15	36.1	20	31.4	25	30.2
	1	24	5	34.2	10	32.1	15	36.1	20	31.4	25	30.2
	1	24	5	34.2	10	32.1	15	36.3	20	31.45	25	30.3
	1	24	5	34.5	10	32.3	15	36.3	20	31.6	25	30.3
	1	24.1	5	34.5	10	32.3	15	36.5	20	31.7	25	30.5
	1	24.1	5	34.6	10	32.5	15	36.6	20	32	25	30.5
	1	24.1	5	34.6	10	32.7	15	36.6	20	32	25	30.8
	1	24.2	5	34.7	10	32.7	15	36.6	20	32.2	25	31
	1	24.2	5	34.8	10	32.8	15	37.2	20	32.2	25	31.5
	1	24.2	5	35	10	32.8	15	37.7	20	32.3	25	32
	1	24.3	5	35	10	32.9	15	38.1	20	32.3	25	32
	1	24.4	5	35.1	10	32.9	15	38.1	20	32.5	25	32.1
	1	24.5	5	35.1	10	32.9	15	38.6	20	32.8	25	32.1
	1	24.5	5	35.1	10	33	15	39.4	20	32.8	25	32.5
	1	24.5	5	35.3	10	33.1	15	40.1	20	32.9	25	32.5
	1	24.6	5	35.6	10	33.2	15	40.1	20	32.9	25	32.5
	1	24.6	5	35.8	10	33.4	15	40.5	20	33.2	25	32.6
	1	24.6	5	35.8	10	33.4	15	40.5	20	33.2	25	32.6
	1	24.6	5	35.8	10	33.6	15	40.7	20	33.5	25	32.7
	1	24.7	5	35.9	10	33.6	15	40.8	20	33.6	25	32.9
	1	24.7	5	36	10	33.6	15	40.8	20	33.7	25	32.9
	1	24.7	5	36.1	10	33.6	15	41	20	34	25	33.1
	1	24.7	5	36.2	10	33.8	15	41	20	34.1	25	33.2
	1	24.7	5	36.6	10	33.8	15	41	20	34.3	25	33.2
	1	24.8	5	36.6	10	34.1	15	41.1	20	34.7	25	33.8
	1	24.9	5	36.6	10	34.1	15	41.1	20	34.7	25	33.9
	1	24.9	5	36.7	10	34.4	15	41.7	20	34.9	25	33.9
	1	25	5	37	10	34.4	15	41.7	20	35.6	25	34.5
	1	25	5	37	10	34.4	15	41.9	20	35.9	25	34.5
	1	25	5	37.2	10	34.4	15	42.1	20	36	25	34.9
	1	25.1	5	37.2	10	34.4	15	42.1	20	36	25	35.4
	1	25.1	5	37.2	10	34.5	15	42.1	20	36.2	25	35.6
	1	25.1	5	37.2	10	34.5	15	42.1	20	36.4	25	36.2
	1	25.2	5	37.3	10	34.5	15	42.1	20	36.5	25	36.4
	1	25.3	5	37.3	10	34.5	15	42.3	20	36.7	25	36.7
	1	25.3	5	37.5	10	34.6	15	42.3	20	36.8	25	37.1
	1	25.3	5	37.5	10	34.6	15	42.3	20	37	25	37.6
	1	25.3	5	37.6	10	34.8	15	42.5	20	37.2	25	38
	1	25.4	5	37.7	10	35	15	42.5	20	37.9	25	38.1
	1	25.4	5	37.7	10	35	15	42.5	20	37.9	25	38.3
	1	25.5	5	37.7	10	35.1	15	42.5	20	38	25	38.9
	1	25.6	5	38	10	35.2	15	43	20	38	25	38.9
	1	25.6	5	38.1	10	35.4	15	43.5	20	38.1	25	39.2
	1	25.6	5	38.1	10	35.4	15	43.5	20	38.3	25	39.8
	1	25.7	5	38.1	10	35.4	15	43.6	20	38.5	25	40
	1	25.7	5	38.1	10	35.4	15	43.9	20	38.6	25	40.4
	1	25.8	5	38.1	10	35.8			20	38.6	25	40.4
	1	25.8	5	38.2	10	35.8			20	38.6	25	40.7
	1	25.8	5	38.3	10	36			20	38.8	25	40.7
	1	25.9	5	38.7	10	36.1			20	39.3	25	40.7
	1	25.9	5	38.8	10	36.1			20	39.3	25	40.7
	1	25.9	5	38.8	10	36.1			20	39.5	25	41.1
	1	26	5	38.8	10	36.1			20	39.5	25	41.4
	1	26	5	38.8	10	36.2			20	39.5	25	41.4
	1	26	5	38.9	10	36.2			20	39.6	25	41.5
	1	26	5	39.2	10	36.2			20	39.8	25	41.9
	1	26.1	5	39.2	10	36.6			20	39.9	25	42.2
	1	26.1	5	39.4	10	36.6			20	40	25	42.2
	1	26.1	5	39.5	10	36.6			20	40.2	25	42.3
	1	26.2	5	39.5	10	36.6			20	40.2	25	42.8
	1	26.3	5	39.7	10	36.8			20	40.7	25	42.9
	1	26.3	5	39.8	10	36.8			20	40.8	25	42.9
	1	26.3			10	36.9			20	41	25	43.2
	1	26.4			10	36.9			20	41	25	43.7
	1	26.4			10	37.1			20	41.2	25	43.8
	1	26.4			10	37.1			20	41.3	25	43.8
	1	26.4			10	37.1			20	41.4	25	44
	1	26.5			10	37.2			20	41.7	25	44
	1	26.5			10	37.2			20	41.9	25	44
	1	26.6			10	37.3			20	41.9	25	29.8
	1	26.6			10	37.4			20	42.1
	1	26.6			10	37.8			20	42.1
	1	26.7			10	37.9			20	42.1
	1	26.8			10	37.9			20	42.1
	1	26.9			10	38			20	42.2
	1	26.9			10	38			20	42.2
	1	27			10	38.1			20	42.3
	1	27.1			10	38.2			20	42.4
	1	27.1			10	38.2			20	42.6
	1	27.2			10	38.4			20	42.6
	1	27.2			10	38.6			20	42.6
	1	27.4			10	38.6			20	42.6
	1	27.4			10	38.7			20	42.7
	1	27.6			10	38.7			20	42.7
	1	27.6			10	38.8			20	42.7
	1	27.8			10	38.8			20	42.7
	1	27.8			10	38.9			20	42.8
	1	27.9			10	39.1			20	42.9
	1	28			10	39.2			20	43
	1	28			10	39.2			20	43.3
	1	28			10	39.3			20	43.3
	1	28			10	39.4			20	43.5
	1	28.1			10	39.5			20	43.6
	1	28.1			10	39.6			20	43.7
	1	28.2			10	39.6			20	43.7
	1	28.2			10	39.8			20	43.7
	1	28.3			10	40			20	44
	1	28.3			10	40.1			20	44
	1	28.3			10	40.1
	1	28.4			10	40.1
	1	28.4			10	40.1
	1	28.5			10	40.1
	1	28.5			10	40.2
	1	28.6			10	40.2
	1	28.6			10	40.3
	1	28.6			10	40.3
	1	28.6			10	40.5
	1	28.6			10	40.5
	1	28.6			10	40.7
	1	28.8			10	40.8
	1	28.8			10	41.4
	1	28.8			10	41.4
	1	29			10	41.5
	1	29			10	41.6
	1	29			10	41.6
	1	29.1			10	41.8
	1	29.2			10	41.8
	1	29.3			10	42
	1	29.3			10	42
	1	29.4			10	42
	1	29.7			10	42
	1	29.7			10	42.1
	1	29.7			10	42.2
	1	29.8			10	42.3
	1	30			10	42.4
	1	30.1			10	42.5
	1	30.3			10	42.5
	1	30.3			10	42.6
	1	30.4			10	42.9
	1	30.5			10	42.9
	1	30.5			10	42.9
	1	30.6			10	42.92
	1	30.6			10	43.4
	1	30.7			10	43.5
	1	30.7			10	43.5
	1	30.8			10	43.5
	1	30.8			10	43.5
	1	30.9			10	43.5
	1	31			10	43.5
	1	31			10	43.6
	1	31.3			10	43.6
	1	31.3			10	43.6
	1	31.3			10	43.8
	1	31.4			10	43.8
	1	31.4			10	44
	1	31.5			10	32.8
	1	31.6			10	35.4
	1	31.7			10	36.7
	1	31.9			10	37.3
	1	31.9			10	38.5
	1	31.9			10	38.8
	1	31.9			10	39.3
	1	32.2
	1	32.3
	1	32.3
	1	32.3
	1	32.4
	1	32.4
	1	32.5
	1	32.6
	1	32.7
	1	32.8
	1	32.8
	1	32.9
	1	32.9
	1	33
	1	33
	1	33
	1	33.1
	1	33.1
	1	33.1
	1	33.2
	1	33.2
	1	33.2
	1	33.3
	1	33.3
	1	33.3
	1	33.4
	1	33.4
	1	33.4
	1	33.4
	1	33.5
	1	33.5
	1	33.5
	1	33.5
	1	33.6
	1	33.6
	1	33.7
	1	33.8
	1	33.9
	1	33.9
	1	34
	1	34
	1	34.1
	1	34.2
	1	34.2
	1	34.2
	1	34.2
	1	34.3
	1	34.3
	1	34.4
	1	34.4
	1	34.5
	1	34.5
	1	34.5
	1	34.5
	1	34.6
	1	34.6
	1	34.7
	1	34.7
	1	34.7
	1	34.7
	1	34.8
	1	35
	1	35
	1	35
	1	35
	1	35.1
	1	35.1
	1	35.1
	1	35.1
	1	35.1
	1	35.2
	1	35.4
	1	35.4
	1	35.5
	1	35.5
	1	35.6
	1	35.6
	1	35.6
	1	35.6
	1	35.7
	1	35.7
	1	35.7
	1	35.8
	1	35.8
	1	35.8
	1	35.9
	1	36
	1	36
	1	36.1
	1	36.1
	1	36.1
	1	36.2
	1	36.2
	1	36.2
	1	36.2
	1	36.3
	1	36.3
	1	36.3
	1	36.3
	1	36.3
	1	36.4
	1	36.5
	1	36.5
	1	36.5
	1	36.6
	1	36.7
	1	36.7
	1	36.8
	1	36.8
	1	36.8
	1	36.8
	1	36.9
	1	36.9
	1	36.9
	1	37
	1	37
	1	37
	1	37
	1	37
	1	37.1
	1	37.1
	1	37.1
	1	37.1
	1	37.1
	1	37.1
	1	37.1
	1	37.2
	1	37.2
	1	37.3
	1	37.3
	1	37.3
	1	37.3
	1	37.3
	1	37.3
	1	37.3
	1	37.3
	1	37.3
	1	37.4
	1	37.4
	1	37.4
	1	37.4
	1	37.4
	1	37.5
	1	37.5
	1	37.6
	1	37.6
	1	37.6
	1	37.6
	1	37.6
	1	37.7
	1	37.7
	1	37.7
	1	37.7
	1	37.7
	1	37.7
	1	37.8
	1	37.9
	1	37.9
	1	37.9
	1	37.9
	1	37.9
	1	38
	1	38.1
	1	38.1
	1	38.1
	1	38.2
	1	38.2
	1	38.2
	1	38.2
	1	38.3
	1	38.3
	1	38.3
	1	38.4
	1	38.4
	1	38.5
	1	38.5
	1	38.5
	1	38.5
	1	38.6
	1	38.6
	1	38.6
	1	38.6
	1	38.8
	1	38.8
	1	38.9
	1	38.9
	1	39
	1	39.1
	1	39.2
	1	39.2
	1	39.2
	1	39.3
	1	39.6
	1	39.7
	1	39.8
	1	39.9
	1	39.9
	1	39.9
	1	40
	1	40

## Sheet: Raw data2
Emergence date	Day of life	Drone temp.	Day light
2020-05-20	1	20.1
2020-05-30	1	20.1	23.3
2020-05-20	1	20.2
2020-05-28	1	20.3
2020-05-28	1	20.3
2020-05-19	1	20.7
2020-05-20	1	20.7
2020-05-20	1	20.8
2020-05-28	1	20.8
2020-05-28	1	20.9
2020-05-28	1	20.9
2020-05-30	1	20.9	27.3
2020-05-30	1	21	25.6
2020-05-20	1	21.1
2020-05-28	1	21.1
2020-05-28	1	21.1
2020-05-28	1	21.1
2020-05-30	1	21.1
2020-05-30	1	21.2	19.8
2020-05-20	1	21.3
2020-05-30	1	21.3	29.2
2020-05-22	1	21.4
2020-05-30	1	21.4	21.3
2020-05-30	1	21.5
2020-05-22	1	21.6
2020-05-28	1	21.6
2020-05-30	1	21.6	37.7
2020-05-30	1	21.6	30.4
2020-05-30	1	21.8	33.4
2020-05-28	1	22.1
2020-05-30	1	22.1	35.2
2020-05-30	1	22.2	35.2
2020-05-30	1	22.3	34.5
2020-05-22	1	22.4
2020-05-28	1	22.4
2020-05-19	1	22.6
2020-05-22	1	22.6
2020-05-30	1	22.6
2020-05-22	1	22.7
2020-05-28	1	22.7
2020-05-27	1	22.8
2020-05-30	1	23	36.6
2020-05-20	1	23.1
2020-05-22	1	23.1
2020-05-30	1	23.1
2020-05-28	1	23.2
2020-05-27	1	23.3
2020-05-30	1	23.3	38.8
2020-05-28	1	23.4
2020-05-27	1	23.5
2020-05-28	1	23.5
2020-05-28	1	23.5
2020-05-22	1	23.6
2020-05-27	1	23.7
2020-05-30	1	23.7	35.5
2020-05-22	1	23.9
2020-05-30	1	23.9	28.7
2020-05-30	1	24	21.3
2020-05-30	1	24	21.5
2020-05-30	1	24
2020-05-19	1	24.1
2020-05-27	1	24.1
2020-05-30	1	24.1
2020-05-20	1	24.2
2020-05-30	1	24.2	38.8
2020-05-30	1	24.2
2020-05-27	1	24.3
2020-05-20	1	24.4
2020-05-28	1	24.5
2020-05-28	1	24.5
2020-05-30	1	24.5	25.1
2020-05-20	1	24.6
2020-05-28	1	24.6
2020-05-28	1	24.6
2020-05-30	1	24.6
2020-05-20	1	24.7
2020-05-22	1	24.7
2020-05-27	1	24.7
2020-05-27	1	24.7
2020-05-30	1	24.7	25.7
2020-05-28	1	24.8
2020-05-30	1	24.9	24.9
2020-05-30	1	24.9
2020-05-28	1	25
2020-05-30	1	25	31
2020-05-30	1	25
2020-05-22	1	25.1
2020-05-30	1	25.1	38.8
2020-05-30	1	25.1	38
2020-05-30	1	25.2	30.5
2020-05-27	1	25.3
2020-05-28	1	25.3
2020-05-28	1	25.3
2020-05-30	1	25.3	30
2020-05-22	1	25.4
2020-05-28	1	25.4
2020-05-30	1	25.5	38.4
2020-05-22	1	25.6
2020-05-27	1	25.6
2020-05-30	1	25.6
2020-05-22	1	25.7
2020-05-30	1	25.7
2020-05-28	1	25.8
2020-05-28	1	25.8
2020-05-28	1	25.8
2020-05-20	1	25.9
2020-05-20	1	25.9
2020-05-30	1	25.9	28.4
2020-05-19	1	26
2020-05-28	1	26
2020-05-30	1	26	26
2020-05-30	1	26	27
2020-05-22	1	26.1
2020-05-30	1	26.1	38
2020-05-30	1	26.1	30.5
2020-05-20	1	26.2
2020-05-20	1	26.3
2020-05-28	1	26.3
2020-05-28	1	26.3
2020-05-22	1	26.4
2020-05-27	1	26.4
2020-05-27	1	26.4
2020-05-28	1	26.4
2020-05-30	1	26.5
2020-05-30	1	26.5
2020-05-22	1	26.6
2020-05-27	1	26.6
2020-05-28	1	26.6
2020-05-30	1	26.7	35.5
2020-05-22	1	26.8
2020-05-30	1	26.9	35
2020-05-30	1	26.9
2020-05-30	1	27
2020-05-30	1	27.1
2020-05-30	1	27.1
2020-05-28	1	27.2
2020-05-28	1	27.2
2020-05-30	1	27.4
2020-05-30	1	27.4
2020-05-22	1	27.6
2020-05-30	1	27.6
2020-05-30	1	27.8
2020-05-30	1	27.8
2020-05-28	1	27.9
2020-05-20	1	28
2020-05-27	1	28
2020-05-28	1	28
2020-05-30	1	28
2020-05-30	1	28.1	22.1
2020-05-30	1	28.1
2020-05-22	1	28.2
2020-05-30	1	28.2
2020-05-22	1	28.3
2020-05-30	1	28.3	20.9
2020-05-30	1	28.3
2020-05-28	1	28.4
2020-05-28	1	28.4
2020-05-20	1	28.5
2020-05-28	1	28.5
2020-05-27	1	28.6
2020-05-27	1	28.6
2020-05-30	1	28.6	35.4
2020-05-30	1	28.6	32.4
2020-05-30	1	28.6
2020-05-30	1	28.6
2020-05-30	1	28.8	31.5
2020-05-30	1	28.8	38.3
2020-05-30	1	28.8
2020-05-20	1	29
2020-05-27	1	29
2020-05-30	1	29	34.4
2020-05-22	1	29.1
2020-05-28	1	29.2
2020-05-22	1	29.3
2020-05-28	1	29.3
2020-05-28	1	29.4
2020-05-22	1	29.7
2020-05-30	1	29.7	36.8
2020-05-30	1	29.7	25.1
2020-05-28	1	29.8
2020-05-22	1	30
2020-05-30	1	30.1
2020-05-19	1	30.3
2020-05-30	1	30.3	26.7
2020-05-19	1	30.4
2020-05-30	1	30.5	26.6
2020-05-30	1	30.5
2020-05-20	1	30.6
2020-05-30	1	30.6	35.1
2020-05-22	1	30.7
2020-05-30	1	30.7	21.1
2020-05-27	1	30.8
2020-05-30	1	30.8	22.6
2020-05-22	1	30.9
2020-05-28	1	31
2020-05-30	1	31	39.1
2020-05-22	1	31.3
2020-05-28	1	31.3
2020-05-30	1	31.3	25.3
2020-05-30	1	31.4	33.1
2020-05-30	1	31.4
2020-05-30	1	31.5	33.6
2020-05-30	1	31.6	31.6
2020-05-27	1	31.7
2020-05-27	1	31.9
2020-05-30	1	31.9	24.1
2020-05-30	1	31.9
2020-05-30	1	31.9
2020-05-28	1	32.2
2020-05-28	1	32.3
2020-05-30	1	32.3	21.6
2020-05-30	1	32.3
2020-05-28	1	32.4
2020-05-30	1	32.4	28
2020-05-30	1	32.5	39.1
2020-05-30	1	32.6
2020-05-28	1	32.7
2020-05-27	1	32.8
2020-05-27	1	32.8
2020-05-28	1	32.9
2020-05-30	1	32.9
2020-05-28	1	33
2020-05-30	1	33
2020-05-30	1	33
2020-05-27	1	33.1
2020-05-27	1	33.1
2020-05-30	1	33.1
2020-05-20	1	33.2
2020-05-22	1	33.2
2020-05-30	1	33.2	29.7
2020-05-30	1	33.3	21.4
2020-05-30	1	33.3
2020-05-30	1	33.3
2020-05-20	1	33.4
2020-05-28	1	33.4
2020-05-28	1	33.4
2020-05-30	1	33.4	34.2
2020-05-27	1	33.5
2020-05-28	1	33.5
2020-05-30	1	33.5	28.4
2020-05-30	1	33.5
2020-05-27	1	33.6
2020-05-30	1	33.6	37.7
2020-05-28	1	33.7
2020-05-19	1	33.8
2020-05-30	1	33.9	24.5
2020-05-30	1	33.9	33.3
2020-05-28	1	34
2020-05-30	1	34	36.8
2020-05-22	1	34.1
2020-05-20	1	34.2
2020-05-30	1	34.2	31.5
2020-05-30	1	34.2
2020-05-30	1	34.2
2020-05-27	1	34.3
2020-05-30	1	34.3	31.3
2020-05-19	1	34.4
2020-05-30	1	34.4	38.1
2020-05-27	1	34.5
2020-05-27	1	34.5
2020-05-30	1	34.5	35.4
2020-05-30	1	34.5
2020-05-30	1	34.6	24.4
2020-05-30	1	34.6
2020-05-22	1	34.7
2020-05-28	1	34.7
2020-05-30	1	34.7
2020-05-30	1	34.7
2020-05-30	1	34.8
2020-05-28	1	35
2020-05-28	1	35
2020-05-28	1	35
2020-05-30	1	35	36.7
2020-05-19	1	35.1
2020-05-28	1	35.1
2020-05-28	1	35.1
2020-05-28	1	35.1
2020-05-30	1	35.1	35.6
2020-05-30	1	35.2
2020-05-30	1	35.4	22.2
2020-05-30	1	35.4
2020-05-22	1	35.5
2020-05-30	1	35.5
2020-05-27	1	35.6
2020-05-30	1	35.6
2020-05-30	1	35.6
2020-05-30	1	35.6
2020-05-27	1	35.7
2020-05-30	1	35.7	28.8
2020-05-30	1	35.7	33.3
2020-05-30	1	35.8	37.6
2020-05-30	1	35.8	26
2020-05-30	1	35.8	38.7
2020-05-22	1	35.9
2020-05-22	1	36
2020-05-30	1	36	35.4
2020-05-28	1	36.1
2020-05-30	1	36.1	38.3
2020-05-30	1	36.1
2020-05-22	1	36.2
2020-05-28	1	36.2
2020-05-30	1	36.2
2020-05-30	1	36.2
2020-05-28	1	36.3
2020-05-30	1	36.3	38.5
2020-05-30	1	36.3
2020-05-30	1	36.3
2020-05-30	1	36.3
2020-05-27	1	36.4
2020-05-30	1	36.5	28.8
2020-05-30	1	36.5	36.2
2020-05-30	1	36.5	30.2
2020-05-30	1	36.6	23.9
2020-05-28	1	36.7
2020-05-30	1	36.7	35.2
2020-05-22	1	36.8
2020-05-30	1	36.8	32
2020-05-30	1	36.8	37.9
2020-05-30	1	36.8
2020-05-19	1	36.9
2020-05-19	1	36.9
2020-05-27	1	36.9
2020-05-19	1	37
2020-05-22	1	37
2020-05-27	1	37
2020-05-30	1	37	25.6
2020-05-30	1	37	22.7
2020-05-27	1	37.1
2020-05-28	1	37.1
2020-05-30	1	37.1	36.7
2020-05-30	1	37.1	37.1
2020-05-30	1	37.1	24.2
2020-05-30	1	37.1
2020-05-30	1	37.1
2020-05-30	1	37.2
2020-05-30	1	37.2
2020-05-19	1	37.3
2020-05-28	1	37.3
2020-05-28	1	37.3
2020-05-30	1	37.3	31.8
2020-05-30	1	37.3	24.8
2020-05-30	1	37.3
2020-05-30	1	37.3
2020-05-30	1	37.3
2020-05-30	1	37.3
2020-05-19	1	37.4
2020-05-27	1	37.4
2020-05-28	1	37.4
2020-05-30	1	37.4
2020-05-30	1	37.4
2020-05-19	1	37.5
2020-05-30	1	37.5	37.1
2020-05-27	1	37.6
2020-05-28	1	37.6
2020-05-30	1	37.6	22.3
2020-05-30	1	37.6	26.1
2020-05-30	1	37.6
2020-05-27	1	37.7
2020-05-28	1	37.7
2020-05-30	1	37.7	38.1
2020-05-30	1	37.7	21
2020-05-30	1	37.7	32.7
2020-05-30	1	37.7
2020-05-30	1	37.8
2020-05-19	1	37.9
2020-05-28	1	37.9
2020-05-30	1	37.9	23.7
2020-05-30	1	37.9	28.6
2020-05-30	1	37.9	30.8
2020-05-30	1	38
2020-05-20	1	38.1
2020-05-22	1	38.1
2020-05-27	1	38.1
2020-05-28	1	38.2
2020-05-30	1	38.2	38.2
2020-05-30	1	38.2
2020-05-30	1	38.2
2020-05-30	1	38.3
2020-05-30	1	38.3
2020-05-30	1	38.3
2020-05-27	1	38.4
2020-05-30	1	38.4	30.8
2020-05-19	1	38.5
2020-05-27	1	38.5
2020-05-30	1	38.5	23.9
2020-05-30	1	38.5
2020-05-20	1	38.6
2020-05-27	1	38.6
2020-05-30	1	38.6	31.9
2020-05-30	1	38.6
2020-05-27	1	38.8
2020-05-30	1	38.8
2020-05-20	1	38.9
2020-05-27	1	38.9
2020-05-22	1	39
2020-05-30	1	39.1
2020-05-19	1	39.2
2020-05-28	1	39.2
2020-05-30	1	39.2
2020-05-30	1	39.3
2020-05-30	1	39.6
2020-05-28	1	39.7
2020-05-30	1	39.8
2020-05-28	1	39.9
2020-05-28	1	39.9
2020-05-30	1	39.9
2020-05-19	1	40
2020-05-19	1	40
2020-05-28	5	21.9
2020-05-22	5	22.4
2020-05-22	5	23
2020-05-28	5	23
2020-05-22	5	23.1
2020-05-22	5	23.7
2020-05-28	5	24
2020-05-22	5	24.3
2020-05-28	5	24.3		118
2020-05-27	5	24.4
2020-05-28	5	24.8
2020-05-28	5	25
2020-05-27	5	25.3
2020-05-22	5	25.4
2020-05-22	5	25.4
2020-05-28	5	25.6
2020-05-27	5	25.7
2020-05-27	5	26.1
2020-05-22	5	26.6
2020-05-28	5	26.6
2020-05-28	5	26.7
2020-05-28	5	26.9
2020-05-28	5	27.1
2020-05-27	5	27.6
2020-05-28	5	27.7
2020-06-01	5	27.7
2020-05-22	5	27.9
2020-05-28	5	29
2020-05-27	5	29.4
2020-05-28	5	29.6
2020-05-22	5	30.1
2020-05-22	5	30.2
2020-05-27	5	30.5
2020-05-28	5	31.3
2020-05-27	5	31.6
2020-05-28	5	31.7
2020-05-22	5	31.8
2020-05-28	5	31.8
2020-05-28	5	31.8
2020-05-28	5	31.8
2020-05-28	5	31.9
2020-05-22	5	32.2
2020-05-28	5	32.2
2020-05-28	5	32.3
2020-05-22	5	32.5
2020-05-28	5	32.5
2020-05-22	5	32.7
2020-05-28	5	32.9
2020-06-01	5	33.2
2020-05-22	5	33.4
2020-05-28	5	33.4
2020-05-22	5	33.6
2020-05-28	5	33.8
2020-05-28	5	33.8
2020-05-28	5	33.8
2020-05-28	5	34
2020-05-22	5	34.2
2020-05-28	5	34.2
2020-05-28	5	34.2
2020-05-27	5	34.5
2020-05-27	5	34.5
2020-05-22	5	34.6
2020-05-28	5	34.6
2020-05-28	5	34.7
2020-05-27	5	34.8
2020-05-28	5	35
2020-05-28	5	35
2020-05-22	5	35.1
2020-05-27	5	35.1
2020-05-28	5	35.1
2020-05-28	5	35.3
2020-05-28	5	35.6
2020-05-22	5	35.8
2020-05-22	5	35.8
2020-05-28	5	35.8
2020-05-28	5	35.9
2020-05-28	5	36
2020-05-22	5	36.1
2020-05-28	5	36.2
2020-05-22	5	36.6
2020-05-27	5	36.6
2020-05-28	5	36.6
2020-05-22	5	36.7
2020-05-28	5	37
2020-05-28	5	37
2020-05-27	5	37.2
2020-05-27	5	37.2
2020-05-28	5	37.2
2020-05-28	5	37.2
2020-05-28	5	37.3
2020-05-28	5	37.3
2020-05-28	5	37.5
2020-05-28	5	37.5
2020-05-28	5	37.6
2020-05-28	5	37.7
2020-05-28	5	37.7
2020-05-28	5	37.7
2020-05-22	5	38
2020-05-22	5	38.1
2020-05-28	5	38.1
2020-05-28	5	38.1
2020-05-28	5	38.1
2020-05-28	5	38.1
2020-05-27	5	38.2
2020-05-28	5	38.3
2020-05-28	5	38.7
2020-05-22	5	38.8
2020-05-22	5	38.8
2020-05-28	5	38.8
2020-05-28	5	38.8
2020-05-28	5	38.9
2020-05-28	5	39.2
2020-05-28	5	39.2
2020-05-27	5	39.4
2020-05-22	5	39.5
2020-05-22	5	39.5
2020-05-27	5	39.7
2020-05-22	5	39.8
2020-05-30	10	23.6
2020-05-30	10	24.5
2020-05-27	10	25.5
2020-05-27	10	26.3
2020-06-01	10	26.4
2020-06-02	10	26.5
2020-06-02	10	26.5
2020-06-03	10	26.5
2020-06-03	10	26.5
2020-06-03	10	26.5
2020-06-03	10	26.5
2020-06-03	10	26.6
2020-06-03	10	26.6
2020-05-30	10	26.8
2020-06-02	10	26.8
2020-05-27	10	27.1
2020-05-27	10	27.1
2020-06-02	10	27.1
2020-05-22	10	27.3
2020-06-03	10	27.3
2020-05-30	10	27.5
2020-06-03	10	27.6
2020-06-03	10	28.4
2020-06-03	10	28.5
2020-06-02	10	28.6
2020-06-02	10	28.6
2020-05-22	10	28.7
2020-05-30	10	28.9
2020-06-03	10	28.9
2020-05-30	10	29.1
2020-05-30	10	29.2
2020-05-30	10	29.4
2020-05-30	10	29.4
2020-05-30	10	30
2020-05-30	10	30
2020-05-27	10	30.1
2020-05-27	10	30.1
2020-05-27	10	30.1
2020-06-02	10	30.1
2020-06-02	10	30.4
2020-06-03	10	30.4
2020-06-03	10	30.4
2020-06-01	10	30.6
2020-06-03	10	30.8
2020-05-30	10	30.9
2020-05-30	10	31.2
2020-06-03	10	31.2
2020-06-03	10	31.2
2020-06-03	10	31.2
2020-05-27	10	31.4
2020-06-03	10	31.6
2020-05-27	10	31.7
2020-05-27	10	31.7
2020-05-27	10	31.7
2020-06-01	10	31.9
2020-06-01	10	32
2020-05-27	10	32.1
2020-05-27	10	32.1
2020-06-03	10	32.1
2020-05-20	10	32.3
2020-05-30	10	32.3
2020-06-01	10	32.5
2020-06-02	10	32.7
2020-06-03	10	32.7
2020-06-01	10	32.8
2020-06-02	10	32.8
2020-06-01	10	32.9
2020-06-02	10	32.9
2020-06-03	10	32.9
2020-05-30	10	33
2020-06-02	10	33.1
2020-06-01	10	33.2
2020-05-27	10	33.4
2020-06-01	10	33.4
2020-06-02	10	33.6
2020-06-02	10	33.6
2020-06-02	10	33.6
2020-06-02	10	33.6
2020-05-30	10	33.8
2020-06-02	10	33.8
2020-05-27	10	34.1
2020-06-02	10	34.1
2020-06-02	10	34.4
2020-06-02	10	34.4
2020-06-02	10	34.4
2020-06-02	10	34.4
2020-06-02	10	34.4
2020-05-22	10	34.5
2020-05-27	10	34.5
2020-05-30	10	34.5
2020-05-30	10	34.5
2020-06-02	10	34.6
2020-06-02	10	34.6
2020-05-27	10	34.8
2020-05-27	10	35
2020-05-30	10	35
2020-05-30	10	35.1
2020-06-03	10	35.2
2020-05-22	10	35.4
2020-06-01	10	35.4
2020-06-02	10	35.4
2020-06-02	10	35.4
2020-05-30	10	35.8
2020-05-30	10	35.8
2020-06-02	10	36
2020-05-27	10	36.1
2020-06-02	10	36.1
2020-06-02	10	36.1
2020-06-02	10	36.1
2020-05-27	10	36.2
2020-06-01	10	36.2
2020-06-03	10	36.2
2020-05-22	10	36.6
2020-05-30	10	36.6
2020-05-30	10	36.6
2020-06-02	10	36.6
2020-05-30	10	36.8
2020-05-30	10	36.8
2020-06-02	10	36.9
2020-06-02	10	36.9
2020-05-22	10	37.1
2020-06-02	10	37.1
2020-06-02	10	37.1
2020-05-22	10	37.2
2020-06-02	10	37.2
2020-05-30	10	37.3
2020-05-22	10	37.4
2020-05-30	10	37.8
2020-06-01	10	37.9
2020-06-01	10	37.9
2020-05-30	10	38
2020-06-01	10	38
2020-05-30	10	38.1
2020-05-30	10	38.2
2020-06-01	10	38.2
2020-06-02	10	38.4
2020-06-01	10	38.6
2020-06-03	10	38.6
2020-06-02	10	38.7
2020-06-02	10	38.7
2020-05-22	10	38.8
2020-06-03	10	38.8
2020-06-02	10	38.9
2020-05-30	10	39.1
2020-05-30	10	39.2
2020-06-03	10	39.2
2020-05-30	10	39.3
2020-06-01	10	39.4
2020-05-20	10	39.5
2020-05-30	10	39.6
2020-06-01	10	39.6
2020-06-03	10	39.8
2020-05-30	10	40
2020-05-30	10	40.1
2020-05-30	10	40.1
2020-06-01	10	40.1
2020-06-01	10	40.1
2020-06-01	10	40.1
2020-05-27	10	40.2
2020-06-03	10	40.2
2020-05-30	10	40.3
2020-06-01	10	40.3
2020-06-02	10	40.5
2020-06-02	10	40.5
2020-06-01	10	40.7
2020-06-01	10	40.8
2020-06-03	10	41.4
2020-06-03	10	41.4
2020-05-30	10	41.5
2020-05-30	10	41.6
2020-05-30	10	41.6
2020-05-30	10	41.8
2020-05-30	10	41.8
2020-05-30	10	42
2020-05-30	10	42
2020-05-30	10	42
2020-05-30	10	42
2020-06-02	10	42.1
2020-06-01	10	42.2
2020-06-02	10	42.3
2020-05-30	10	42.4
2020-05-30	10	42.5
2020-05-30	10	42.5
2020-06-02	10	42.6
2020-06-01	10	42.9
2020-06-02	10	42.9
2020-06-02	10	42.9
2020-06-01	10	42.92
2020-05-27	10	43.4
2020-05-30	10	43.5
2020-06-02	10	43.5
2020-06-02	10	43.5
2020-06-02	10	43.5
2020-06-02	10	43.5
2020-06-03	10	43.5
2020-05-30	10	43.6
2020-05-30	10	43.6
2020-05-30	10	43.6
2020-06-02	10	43.8
2020-06-02	10	43.8
2020-06-02	10	44
2020-05-22	10	32.8
2020-05-22	10	35.4
2020-05-22	10	36.7
2020-05-22	10	37.3
2020-05-22	10	38.5
2020-05-22	10	38.8
2020-05-22	10	39.3
2020-05-27	15	23.5
2020-05-22	15	25.2
2020-05-27	15	25.2
2020-05-27	15	25.2
2020-06-03	15	25.2
2020-06-03	15	25.5
2020-06-03	15	25.5
2020-06-03	15	25.9
2020-05-27	15	26.4
2020-06-03	15	26.9
2020-06-03	15	26.9
2020-06-02	15	27.3
2020-05-27	15	27.4
2020-06-10	15	27.9
2020-06-10	15	27.9
2020-05-27	15	28.3
2020-06-10	15	28.3
2020-06-03	15	28.5
2020-06-10	15	29.1
2020-06-10	15	29.1
2020-06-10	15	29.1
2020-05-22	15	30
2020-05-27	15	30
2020-06-10	15	30.1
2020-06-02	15	30.4
2020-06-10	15	30.5
2020-05-22	15	30.7
2020-06-10	15	30.7
2020-06-10	15	30.7
2020-06-10	15	31.2
2020-06-03	15	31.4
2020-06-02	15	31.5
2020-05-22	15	31.8
2020-06-02	15	32
2020-06-02	15	32
2020-06-10	15	32.2
2020-05-20	15	32.3
2020-06-02	15	32.3
2020-06-03	15	32.3
2020-06-10	15	32.3
2020-05-22	15	33.1
2020-06-03	15	33.2
2020-06-03	15	33.6
2020-05-28	15	33.7
2020-05-28	15	33.7
2020-06-03	15	33.7
2020-06-03	15	33.7
2020-06-03	15	33.7
2020-06-03	15	33.9
2020-06-02	15	34.2
2020-05-22	15	35.2
2020-06-10	15	35.3
2020-06-02	15	35.4
2020-06-02	15	35.7
2020-06-10	15	35.9
2020-06-03	15	36
2020-06-02	15	36.1
2020-06-03	15	36.1
2020-05-28	15	36.3
2020-06-10	15	36.3
2020-06-02	15	36.5
2020-06-02	15	36.6
2020-06-03	15	36.6
2020-06-03	15	36.6
2020-06-10	15	37.2
2020-06-02	15	37.7
2020-06-03	15	38.1
2020-06-03	15	38.1
2020-06-10	15	38.6
2020-06-10	15	39.4
2020-06-02	15	40.1
2020-06-02	15	40.1
2020-06-03	15	40.5
2020-06-03	15	40.5
2020-06-02	15	40.7
2020-06-10	15	40.8
2020-06-10	15	40.8
2020-06-02	15	41
2020-06-02	15	41
2020-06-10	15	41
2020-06-03	15	41.1
2020-06-03	15	41.1
2020-05-28	15	41.7
2020-06-02	15	41.7
2020-05-22	15	41.9
2020-05-28	15	42.1
2020-05-28	15	42.1
2020-05-28	15	42.1
2020-06-02	15	42.1
2020-06-02	15	42.1
2020-05-27	15	42.3
2020-06-02	15	42.3
2020-06-02	15	42.3
2020-06-02	15	42.5
2020-06-02	15	42.5
2020-06-10	15	42.5
2020-06-10	15	42.5
2020-06-10	15	43
2020-05-28	15	43.5
2020-06-10	15	43.5
2020-05-28	15	43.6
2020-05-28	15	43.9
2020-05-28	20	24.6
2020-05-28	20	26
2020-06-05	20	26.1
2020-06-03	20	26.4
2020-06-02	20	27.2
2020-06-05	20	27.2
2020-05-28	20	27.5
2020-05-28	20	27.5
2020-06-02	20	27.5
2020-06-02	20	27.8
2020-06-05	20	27.8
2020-06-05	20	28
2020-06-03	20	28.1
2020-06-03	20	28.1
2020-06-05	20	28.1
2020-06-05	20	28.2
2020-06-02	20	28.3
2020-06-03	20	28.3
2020-06-02	20	28.5
2020-06-05	20	28.5
2020-05-28	20	29.3
2020-06-01	20	29.3
2020-06-01	20	29.3
2020-06-03	20	29.4
2020-06-05	20	29.4
2020-06-01	20	29.5
2020-06-02	20	29.5
2020-06-02	20	29.5
2020-06-02	20	29.5
2020-05-28	20	29.8
2020-06-03	20	29.9
2020-06-02	20	30
2020-06-02	20	30
2020-06-02	20	30
2020-06-03	20	30
2020-05-28	20	30.1
2020-06-02	20	30.1
2020-06-02	20	30.2
2020-06-01	20	30.3
2020-05-28	20	30.4
2020-06-03	20	30.4
2020-06-03	20	30.5
2020-06-05	20	30.5
2020-06-01	20	30.7
2020-06-02	20	30.7
2020-06-03	20	30.7
2020-06-05	20	30.8
2020-06-01	20	30.9
2020-06-03	20	30.9
2020-06-02	20	31
2020-06-02	20	31
2020-06-02	20	31.1
2020-06-02	20	31.1
2020-06-02	20	31.2
2020-06-02	20	31.2
2020-06-02	20	31.2
2020-06-02	20	31.4
2020-06-03	20	31.4
2020-06-05	20	31.45
2020-06-03	20	31.6
2020-05-28	20	31.7
2020-06-05	20	32
2020-06-05	20	32
2020-05-28	20	32.2
2020-06-05	20	32.2
2020-06-03	20	32.3
2020-06-03	20	32.3
2020-06-05	20	32.5
2020-05-28	20	32.8
2020-06-05	20	32.8
2020-06-03	20	32.9
2020-06-03	20	32.9
2020-06-05	20	33.2
2020-06-05	20	33.2
2020-06-01	20	33.5
2020-05-28	20	33.6
2020-05-28	20	33.7
2020-06-03	20	34
2020-05-28	20	34.1
2020-06-05	20	34.3
2020-06-02	20	34.7
2020-06-02	20	34.7
2020-05-28	20	34.9
2020-06-03	20	35.6
2020-06-02	20	35.9
2020-06-01	20	36
2020-06-01	20	36
2020-06-02	20	36.2
2020-05-28	20	36.4
2020-06-03	20	36.5
2020-05-28	20	36.7
2020-06-05	20	36.8
2020-06-02	20	37
2020-06-05	20	37.2
2020-06-05	20	37.9
2020-06-05	20	37.9
2020-06-02	20	38
2020-06-02	20	38
2020-06-02	20	38.1
2020-06-03	20	38.3
2020-05-28	20	38.5
2020-06-01	20	38.6
2020-06-01	20	38.6
2020-06-05	20	38.6
2020-05-28	20	38.8
2020-05-28	20	39.3
2020-05-28	20	39.3
2020-05-28	20	39.5
2020-06-01	20	39.5
2020-06-01	20	39.5
2020-06-03	20	39.6
2020-06-02	20	39.8
2020-06-02	20	39.9
2020-05-28	20	40
2020-06-03	20	40.2
2020-06-03	20	40.2
2020-06-02	20	40.7
2020-05-28	20	40.8
2020-05-28	20	41
2020-05-28	20	41
2020-06-01	20	41.2
2020-06-02	20	41.3
2020-05-28	20	41.4
2020-06-03	20	41.7
2020-06-05	20	41.9
2020-06-05	20	41.9
2020-05-28	20	42.1
2020-06-02	20	42.1
2020-06-05	20	42.1
2020-06-05	20	42.1
2020-06-01	20	42.2
2020-06-01	20	42.2
2020-05-28	20	42.3
2020-05-28	20	42.4
2020-06-01	20	42.6
2020-06-01	20	42.6
2020-06-05	20	42.6
2020-06-05	20	42.6
2020-06-01	20	42.7
2020-06-01	20	42.7
2020-06-03	20	42.7
2020-06-03	20	42.7
2020-06-01	20	42.8
2020-06-02	20	42.9
2020-06-01	20	43
2020-06-02	20	43.3
2020-06-02	20	43.3
2020-06-02	20	43.5
2020-06-03	20	43.6
2020-05-28	20	43.7
2020-05-28	20	43.7
2020-06-02	20	43.7
2020-06-02	20	44
2020-06-02	20	44
2020-06-01	25	24.8
2020-06-01	25	25
2020-06-02	25	25.1
2020-06-01	25	25.3
2020-06-02	25	25.3
2020-06-02	25	25.3
2020-06-01	25	25.4
2020-06-02	25	25.5
2020-05-30	25	25.6
2020-05-30	25	25.7
2020-06-02	25	26.2
2020-06-02	25	26.2
2020-05-30	25	26.3
2020-06-02	25	26.3
2020-06-02	25	26.4
2020-06-02	25	26.5
2020-06-01	25	26.6
2020-06-02	25	26.6
2020-06-02	25	26.6
2020-06-02	25	26.7
2020-06-01	25	26.8
2020-05-22	25	27
2020-06-02	25	27
2020-06-01	25	27.1
2020-05-30	25	27.2
2020-06-01	25	27.3
2020-05-30	25	27.5
2020-05-30	25	27.6
2020-05-30	25	27.6
2020-06-02	25	27.7
2020-05-22	25	27.8
2020-06-01	25	27.8
2020-05-30	25	27.9
2020-06-01	25	28
2020-06-02	25	28
2020-06-03	25	28
2020-05-28	25	28.2
2020-06-02	25	28.2
2020-06-02	25	28.2
2020-06-02	25	28.2
2020-05-30	25	28.5
2020-06-03	25	28.6
2020-06-03	25	28.6
2020-05-30	25	28.7
2020-06-02	25	28.7
2020-06-02	25	28.9
2020-06-03	25	29
2020-06-03	25	29.1
2020-06-02	25	29.4
2020-05-30	25	29.6
2020-05-20	25	29.8
2020-05-30	25	29.8
2020-05-30	25	29.9
2020-05-30	25	29.9
2020-05-30	25	30
2020-05-30	25	30.2
2020-05-30	25	30.2
2020-06-01	25	30.2
2020-05-28	25	30.3
2020-05-28	25	30.3
2020-05-30	25	30.5
2020-05-30	25	30.5
2020-06-03	25	30.8
2020-06-02	25	31
2020-06-01	25	31.5
2020-06-03	25	32
2020-06-03	25	32
2020-06-01	25	32.1
2020-06-03	25	32.1
2020-06-01	25	32.5
2020-06-01	25	32.5
2020-06-01	25	32.5
2020-06-01	25	32.6
2020-06-01	25	32.6
2020-05-30	25	32.7
2020-05-30	25	32.9
2020-05-30	25	32.9
2020-06-01	25	33.1
2020-05-22	25	33.2
2020-06-01	25	33.2
2020-05-30	25	33.8
2020-05-30	25	33.9
2020-05-30	25	33.9
2020-05-30	25	34.5
2020-06-03	25	34.5
2020-05-30	25	34.9
2020-06-03	25	35.4
2020-06-03	25	35.6
2020-05-30	25	36.2
2020-06-03	25	36.4
2020-06-03	25	36.7
2020-06-03	25	37.1
2020-06-03	25	37.6
2020-06-03	25	38
2020-06-01	25	38.1
2020-06-03	25	38.3
2020-05-30	25	38.9
2020-05-30	25	38.9
2020-06-03	25	39.2
2020-06-03	25	39.8
2020-06-03	25	40
2020-06-02	25	40.4
2020-06-02	25	40.4
2020-06-01	25	40.7
2020-06-01	25	40.7
2020-06-01	25	40.7
2020-06-01	25	40.7
2020-05-30	25	41.1
2020-06-01	25	41.4
2020-06-03	25	41.4
2020-06-01	25	41.5
2020-05-30	25	41.9
2020-06-03	25	42.2
2020-06-03	25	42.2
2020-06-01	25	42.3
2020-06-03	25	42.8
2020-05-30	25	42.9
2020-05-30	25	42.9
2020-05-30	25	43.2
2020-06-03	25	43.7
2020-05-30	25	43.8
2020-06-03	25	43.8
2020-05-30	25	44
2020-05-30	25	44
2020-05-30	25	44
2020-06-03	25	29.8
